# Supplementary material
Source: Springer Nature journal article supplement (https://www.springermedizin.de/resource/supplementary/13058_2010_2751_MOESM10_ESM.pdf/9702078)

Plotted SNPs

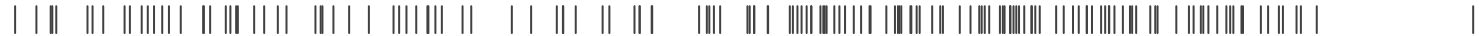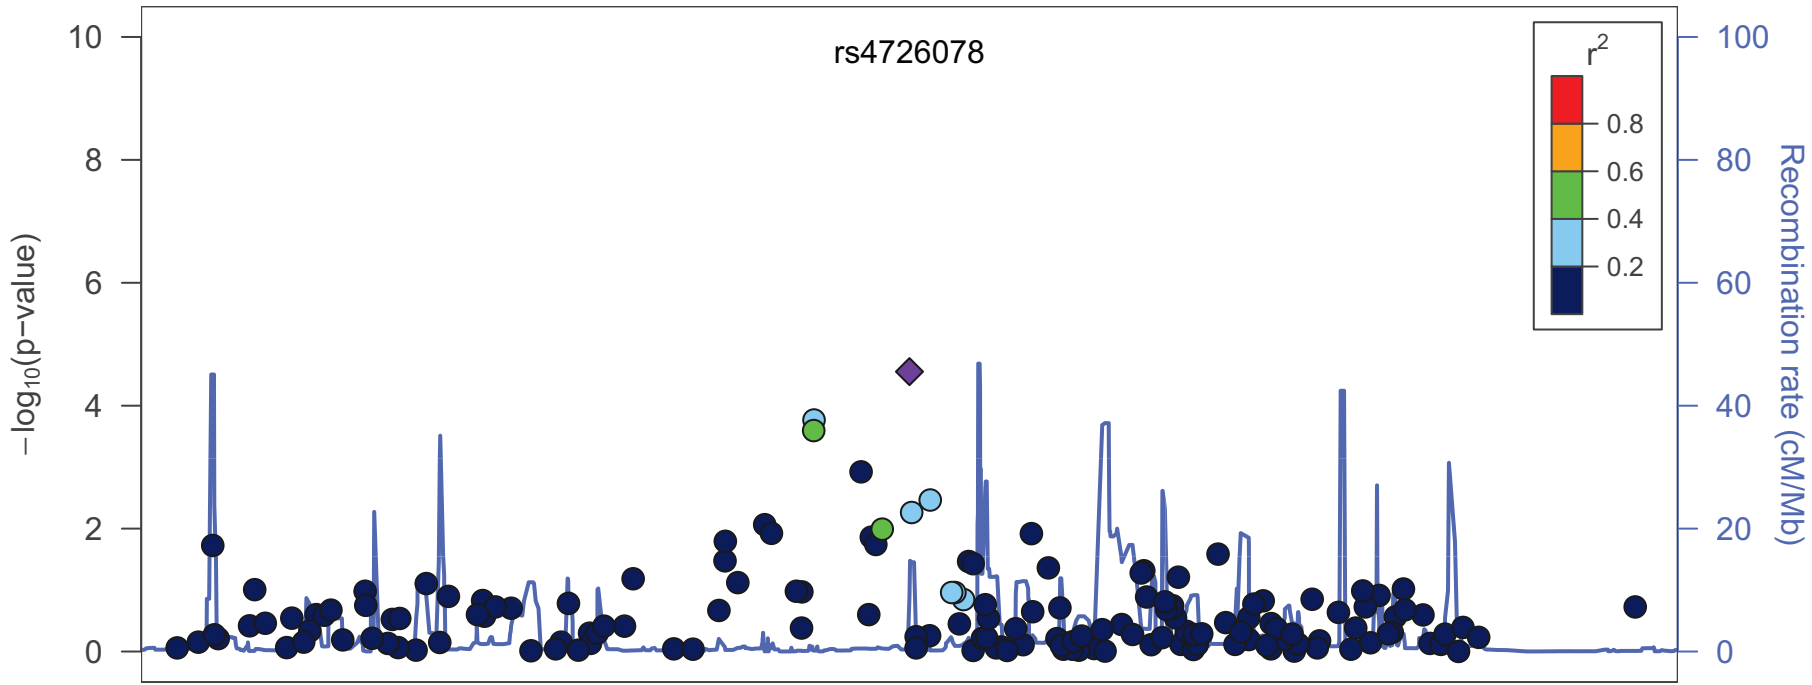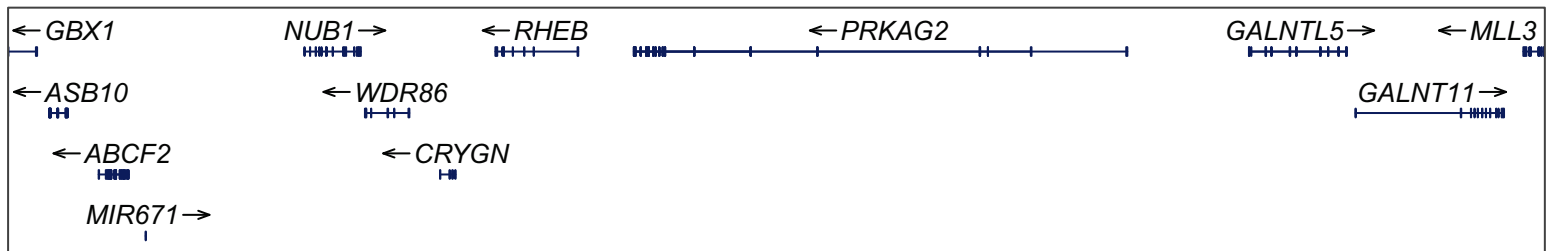

2 genes omitted

150.6      150.8      151      151.2      151.4

Position on chr7 (Mb)

Supplement: MOESM10 [file 9702078]
